# Supplementary material for: 2D MXene-derived Nb2O5/C/Nb2C/g-C3N4 heterojunctions for efficient nitrogen photofixation
Source: Royal Society of Chemistry journal article supplement (doi:10.1039/d0cy00656d), 2020-01-01
Supplement: d0cy00656d1.pdf [file d0cy00656d1.pdf]

## 2D MXene-derived Nb<sub>2</sub>O<sub>5</sub>/C/Nb<sub>2</sub>C/g-C<sub>3</sub>N<sub>4</sub> heterojunctions for efficient nitrogen photofixation

Heyan Jiang,<sup>a\*</sup> Cuicui Zang,<sup>a</sup> Yinglan Zhang,<sup>a</sup> Wenhai Wang,<sup>b</sup> Chaofen Yang,<sup>c</sup> Bin Sun,<sup>a</sup> Yu Shen<sup>a,d</sup> and Fengxia Bian<sup>a\*</sup>

a. Chongqing Key Laboratory of Catalysis and New Environmental Materials, College of Environmental and Resources, National Base of International Science and Technology Cooperation for Intelligent Manufacturing Service, Chongqing Technology and Business University, Chongqing 400067, China. \* Corresponding author. E-mail: orgjiang@163.com (H. Jiang), bianqian1201@163.com (F. Bian).

b. Key Laboratory of Coastal Zone Environmental Processes and Ecological Remediation, Yantai Institute of Coastal Zone Research, Chinese Academy of Sciences, Yantai 264003, China.

c. Research Center for Analysis and Measurement, Kunming University of Science and Technology, Kunming 650093, China.

d. Chongqing South-to-Thais Environmental Protection Technology Research Institute Co., Ltd., Chongqing, 400060, China.

### Experimental Section

#### Nb<sub>2</sub>CT<sub>x</sub>, Nb<sub>2</sub>O<sub>5</sub>/C/Nb<sub>2</sub>C and Nb<sub>2</sub>O<sub>5</sub> synthesis

Nb<sub>2</sub>CT<sub>x</sub> was prepared according to literature.<sup>1</sup> Nb<sub>2</sub>O<sub>5</sub>/C/Nb<sub>2</sub>C was prepared according to literature.<sup>2</sup> Nb<sub>2</sub>O<sub>5</sub> was prepared with the similar method as Nb<sub>2</sub>O<sub>5</sub>/C/Nb<sub>2</sub>C except calcining the Nb<sub>2</sub>CT<sub>x</sub> at 850 °C in the CO<sub>2</sub> environment for three hours.<sup>2</sup>

#### Nb<sub>2</sub>O<sub>5</sub>/C/Nb<sub>2</sub>C/g-C<sub>3</sub>N<sub>4</sub> and Nb<sub>2</sub>O<sub>5</sub>/g-C<sub>3</sub>N<sub>4</sub> heterojunctions

Nb<sub>2</sub>O<sub>5</sub>/C/Nb<sub>2</sub>C/g-C<sub>3</sub>N<sub>4</sub> heterojunctions were obtained by means of simple calcination of Nb<sub>2</sub>O<sub>5</sub>/C/Nb<sub>2</sub>C and melamine mixture. Typically, a certain amount of melamine and Nb<sub>2</sub>O<sub>5</sub>/C/Nb<sub>2</sub>C was added to 20 mL of distilled water and mixed by using ultrasound to obtain a homogeneous dispersion. Mixture was dried at 60 °C and ground to fine powder, which was calcined at 550 °C for 2 h in tube furnace at a heating rate of 5 °C min<sup>-1</sup> under N<sub>2</sub>. The

Nb<sub>2</sub>O<sub>5</sub>/C/Nb<sub>2</sub>C/g-C<sub>3</sub>N<sub>4</sub> 1:1 with the Nb<sub>2</sub>O<sub>5</sub>/C/Nb<sub>2</sub>C:melamine ratio 1:1 demonstrated the best catalytic performance. If no further notice provided, the Nb<sub>2</sub>O<sub>5</sub>/C/Nb<sub>2</sub>C/g-C<sub>3</sub>N<sub>4</sub> in this work alludes on Nb<sub>2</sub>O<sub>5</sub>/C/Nb<sub>2</sub>C/g-C<sub>3</sub>N<sub>4</sub> 1:1. Nb<sub>2</sub>O<sub>5</sub>/g-C<sub>3</sub>N<sub>4</sub> was prepared in the same way except Nb<sub>2</sub>O<sub>5</sub> replaced Nb<sub>2</sub>O<sub>5</sub>/C/Nb<sub>2</sub>C.

### Characterization of the photocatalysts

Micromeritics ASAP 2020M automatic surface analyzer was used for BET analysis of the samples. Fourier transform infrared (FT-IR) spectras were obtained on the IRPrestige-21 instrument (400-2100 cm<sup>-1</sup>). Scanning electron microscopy (SEM) was tested with the SU1510 (Hitachi, Japan). Transmission electron microscopy (TEM) measurements were tested with the FEI corporation Tecnai G2 F20. Powder X-ray diffraction (XRD) patterns were carried out with a LynxEye array detector/Bruker D8 Advance (5-80°). X-ray photoelectron spectroscopy (XPS) spectra was conducted with Thermo Scientific Escalab 250Xi. The photocurrent performances were tested with an electrochemical system (CHI-660B, Chinehwa, Shanghai, China). The linear scanning curve was carried out with CHI-660B electrochemical workstation in Ar or N<sub>2</sub> saturated 0.5 mol L<sup>-1</sup> Na<sub>2</sub>SO<sub>4</sub> with a scan rate of 10 mV s<sup>-1</sup>. The cyclic voltammetry was also carried out with CHI-660B electrochemical workstation, electrolyte: 5 × 10<sup>-3</sup> M of K<sub>3</sub>Fe(CN)<sub>6</sub> in 0.1 M KCl, scan rate: 50 mV s<sup>-1</sup>. Photoluminescence (PL) spectra were tested with the Hitachi F-7000. UV-vis diffuse reflectance spectra (UV-vis DRS) were tested with a Hitachi UH4150 UV-vis DRS to investigate the optical properties of the samples (200-800 nm).

### Photocatalytic N<sub>2</sub> fixation experiments

The photocatalytic N<sub>2</sub> fixation was carried out with a homemade 500 mL reaction cell with cooling system at 1atm pressure. 50 mg of photocatalyst was well suspended in 50 mL of double distilled water with 20 vol% CH<sub>3</sub>OH. 99.999% N<sub>2</sub> with 100 mL min<sup>-1</sup> was bubbled through the solution to achieve N<sub>2</sub> saturation in the dark for 1 hour. Reaction was carried out with the irradiation of Xe lamp around 0.5 W cm<sup>-2</sup> with magnetic stirring. NH<sub>4</sub><sup>+</sup> concentration was analyzed with Nessler's reagent method.<sup>3</sup>

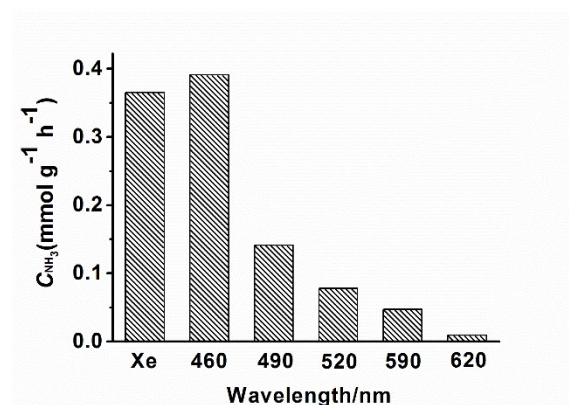

Fig. S1. Wavelength dependence of the nitrogen photofixation efficiency over Nb<sub>2</sub>O<sub>5</sub>/C/Nb<sub>2</sub>C/g-C<sub>3</sub>N<sub>4</sub>.

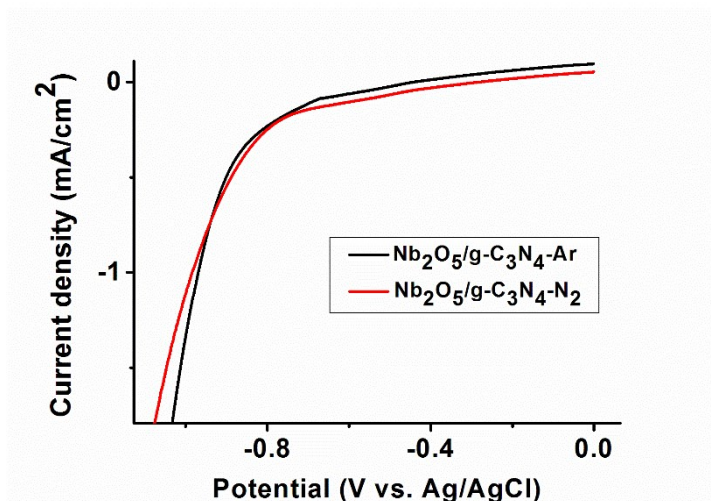

Fig. S2. Linear sweep voltammetry of Nb<sub>2</sub>O<sub>5</sub>/g-C<sub>3</sub>N<sub>4</sub> under Ar or N<sub>2</sub> saturated solution.

### References

- 1 M. Naguib, J. Halim, J. Lu, K. M. Cook, L. Hultman, Y. Gogotsi and M. W. Barsoum, *J. Am. Chem. Soc.* 2013, **135**, 15966-15969.
- 2 T. Su, R. Peng, Z. D. Hood, M. Naguib, I. N. Ivanov, J. K. Keum, Z. Qin, Z. Guo and Z. Wu, *ChemSusChem* 2018, **11**, 688-699.
- 3 Y. Zhao, R. Shi, X. Bian, C. Zhou, Y. Zhao, S. Zhang, F. Wu, G. I. N. Waterhouse and T. R. Zhang, *Adv. Sci.* 2019, **6**, 1802109.
